# Supplementary material
Source: publisher figshare collection journal article supplement (https://acs.figshare.com/ndownloader/files/3955327)
Supplement: Supplementary file 1 [file 3955327]

# Solid-State NMR Spectra of Lipid-Anchored Proteins under Magic Angle Spinning

## Supporting Information

*Kaoru Nomura\*, Erisa Harada, Kenji Sugase, and Keiko Shimamoto*

Bioorganic Research Institute, Suntory Foundation for Life Sciences, 1-1-1 Wakayamadai, Shimamoto-Cho, Mishima-Gun, Osaka 618-8503, Japan

\*K. Nomura: e-mail, [nomura@sunbor.or.jp](mailto:nomura@sunbor.or.jp).

### 1. Synthesis of Lipid-Anchor Mimic.

**General methods.** All chemicals were reagent grade and purchased from Nacalai Tesque\_(Kyoto, Japan). All reactions were monitored using TLC on Silica Gel 60 F254 precoated glass slides (Merck) with examination under UV light (254 nm) and/or by charring with 5% 12 molybdo(VI)phosphoric acid in EtOH. Flash column chromatography was performed on silica gels (Silica Gel 60 mesh 230-400 or spherical, Nacalai Tesque).  $^1\text{H}$ ,  $^{13}\text{C}$ , and  $^{31}\text{P}$  NMR spectra were recorded at 25 °C on a Bruker DMX-500 spectrometer (Bruker Biospin) and analyzed with

solvent peaks as internal references for  $^1\text{H}$  and  $^{13}\text{C}$  NMR or 5%  $\text{H}_3\text{PO}_4$  for  $^{31}\text{P}$  NMR. The overall synthetic scheme is shown in Scheme 1.

***N*-(3-(maleimido)propionyl)-2-aminoethanol (1).** To an ice-cold solution of ethanolamine (189  $\mu\text{L}$ , 3.14 mmol) in  $\text{CH}_2\text{Cl}_2$  (10 mL), 3-(maleimido)propionic acid *N*-hydroxysuccinimide ester (760 mg, 2.85 mmol) in  $\text{CH}_2\text{Cl}_2$  (10 mL) was added drop-wise under an Ar atmosphere for 1 h. The reaction mixture was concentrated and purified by  $\text{SiO}_2$ -column chromatography ( $\text{MeOH}/\text{CHCl}_3$  1/50  $\rightarrow$  1/9) to give the desired product **1** (490 mg, 81%) as a colorless solid.  $^1\text{H}$  NMR (500 MHz,  $\text{CD}_3\text{OD}$ )  $\delta$  2.45 (t,  $^3J_{(\text{H,H})} = 7.0$  Hz, 2 H;  $\text{CH}_2$ ), 3.22 (dt,  $^3J_{(\text{H,H})} = 5.8, 10.9$  Hz, 2 H;  $\text{CH}_2$ ), 3.53 (t,  $^3J_{(\text{H,H})} = 5.8$  Hz, 2 H;  $\text{CH}_2$ ), 3.75 (t,  $^3J_{(\text{H,H})} = 7.0$  Hz, 2 H;  $\text{CH}_2$ ), 6.79 (s, 2 H;  $\text{CH}=\text{CH}$ ).

**3-*O*-(2-cyanoethyl (*N*-(3-(maleimido)propionyl)-2-aminoethyl)phosphono)-1,2-*O*-dimyristoyl-*sn*-glycerol(2).** To a solution of 1,2-*O*-dimyristoyl-*sn*-glycerol (424 mg, 0.83 mmol)<sup>S1</sup> and 1*H*-tetrazole (116 mg, 1.66 mmol) in  $\text{CH}_2\text{Cl}_2$  (5 mL), a solution of 2-cyanoethyl *N,N,N,N*-tetraisopropylphosphorodiamidite (500 mg, 1.66 mmol) in  $\text{CH}_2\text{Cl}_2$  (5 mL) was added.<sup>S2</sup> The reaction mixture was stirred for 1 h at room temperature, concentrated *in vacuo*, and purified by  $\text{SiO}_2$ -column chromatography (hexane/AcOEt/ $\text{Et}_3\text{N}$  6/1/0.1) to give the phosphoroamidite (524 mg, 88%) as a colorless oil. To a suspension of **1** (140 mg, 0.66 mmol) in  $\text{CH}_2\text{Cl}_2$  (10 mL), a solution of the phosphoroamidite (426 mg, 0.60 mmol) in  $\text{CH}_2\text{Cl}_2$  (10 mL) and 1*H*-tetrazole (210 mg, 3 mmol) was added under an Ar atmosphere. After the mixture was stirred for 1 h at room temperature, a solution of *m*CPBA (172 mg, 1 mmol) in  $\text{CH}_2\text{Cl}_2$  (1 mL) was added. The mixture was stirred for an additional 1 h at room temperature, and extracted with AcOEt. The organic phase was washed with aqueous  $\text{NaHCO}_3$  and brine, dried over  $\text{MgSO}_4$ , and concentrated *in vacuo*. The obtained crude product was purified by  $\text{SiO}_2$ -column

chromatography (MeOH/CHCl<sub>3</sub> 1/50 → 1/20) to give the desired product **2** (398 mg, 80%) as a colorless oil. <sup>1</sup>H NMR (500 MHz, CDCl<sub>3</sub>) δ 0.87 (t, <sup>3</sup>J<sub>(H,H)</sub> = 6.7 Hz, 6 H; CH<sub>3</sub> x2), 1.16-1.32 (m, 40 H), 1.59 (m, 4 H; CH<sub>2</sub> x2), 2.31 (t, <sup>3</sup>J<sub>(H,H)</sub> = 7.5 Hz, 2 H; CH<sub>2</sub>), 2.34 (t, <sup>3</sup>J<sub>(H,H)</sub> = 7.5 Hz, 2 H; CH<sub>2</sub>), 2.54 (m, 2 H; CH<sub>2</sub>), 2.78 (m, 2 H; CH<sub>2</sub>), 3.52 (m, 2 H; CH<sub>2</sub>), 3.84 (m, 2 H; CH<sub>2</sub>), 4.10-4.36 (m, 8 H; CH<sub>2</sub> x4), 5.26 (m, 1 H; CH), 6.56 (m, 1 H; NH), 6.69 (s, 2 H; CH=CH). <sup>13</sup>C NMR (125 MHz, CDCl<sub>3</sub>) δ 14.0, 19.6, 19.7, 22.6, 24.7, 28.98, 29.02, 29.2, 29.3, 29.4, 29.5-29.6, 31.8, 33.9, 34.1, 34.11, 34.4, 61.5, 62.2, 65.9, 67.4, 69.2, 116.5, 134.1, 170.1, 170.4, 172.9, 173.3. <sup>31</sup>P NMR (202 MHz, CDCl<sub>3</sub>) δ -1.11.

**3-O-(N-(3-(maleimido)propionyl)-2-aminoethyl phosphono)-1,2-O-dimyristoyl-sn-glycerol triethylamine salt (3).** To a solution of **2** (35 mg, 0.042 mmol) in CH<sub>2</sub>Cl<sub>2</sub> (2 mL), a solution of DBU (37 μL, 0.25 mmol) in CH<sub>2</sub>Cl<sub>2</sub> (2 mL) was added at 0 °C under an Ar atmosphere.<sup>[S3]</sup> After being stirred for 5 min at 0 °C, the mixture was quenched with ice-cold 0.1 M HCl, and was extracted with CHCl<sub>3</sub>. The organic phase was washed with brine, dried over MgSO<sub>4</sub>, and concentrated *in vacuo*. The obtained crude product was purified by SiO<sub>2</sub>-column chromatography (MeOH/CHCl<sub>3</sub> 5/95 → MeOH/CHCl<sub>3</sub>/Et<sub>3</sub>N 10/90/1 → 20/80/1) to give the desired product **3** (28 mg, 85%) as a pale yellow oil. <sup>1</sup>H NMR (500 MHz, 50% CD<sub>3</sub>OD/CDCl<sub>3</sub>) δ 0.85 (t, <sup>3</sup>J<sub>(H,H)</sub> = 6.7 Hz, 6 H; CH<sub>3</sub> x2), 1.18-1.29 (m, 40 H), 1.31 (t, <sup>3</sup>J<sub>(H,H)</sub> = 7.3 Hz, 9 H; CH<sub>3</sub> x3), 1.57 (m, 4 H; CH<sub>2</sub> x2), 2.26 (m, 4 H; CH<sub>2</sub> x2), 2.48 (t, <sup>3</sup>J<sub>(H,H)</sub> = 7.5 Hz, 2 H; CH<sub>2</sub>), 3.03 (q, <sup>3</sup>J<sub>(H,H)</sub> = 7.3 Hz, 6 H; CH<sub>2</sub> x3), 3.41 (m, 2 H; CH<sub>2</sub>), 3.81 (t, <sup>3</sup>J<sub>(H,H)</sub> = 7.4 Hz, 2 H; CH<sub>2</sub>), 3.92-3.99 (m, 4 H; CH<sub>2</sub> x2), 4.14 (dd, <sup>3</sup>J<sub>(H,H)</sub> = 6.6, 12.0 Hz, 1 H; CH<sub>2</sub>), 4.36 (dd, <sup>3</sup>J<sub>(H,H)</sub> = 3.2, 12.0 Hz, 1 H; CH<sub>2</sub>), 5.21 (m, 1 H; CH), 6.65 (s, 2 H; CH=CH). <sup>13</sup>C NMR (125 MHz, 50% CD<sub>3</sub>OD/CDCl<sub>3</sub>) δ 8.5, 14.0, 22.6, 24.76, 24.80, 29.01, 29.03, 29.19, 29.20, 29.4, 29.5-29.6, 31.8, 34.0, 34.18,

34.23, 34.3, 40.91, 40.94, 45.5, 62.5, 63.50, 63.54, 63.89, 63.94, 70.23, 70.29, 134.1, 169.8, 170.4, 173.0, 173.4.  $^{31}\text{P}$  NMR (202 MHz, 50%  $\text{CD}_3\text{OD}/\text{CDCl}_3$ )  $\delta$  1.11.

## 2. Expression and Purification of Cysteine-Tagged GB1.

The DNA sequence corresponding to the GB1-GSMNGSSGS-C (GB1-linker) construct was subcloned from a full-length GB1 construct. The DNA sequences were PCR amplified using corresponding primers and pET21a-GB1 as the template DNA. The amplified genes were ligated back into the pET21a vector (Novagen) using the *Nde*I and *Bam*HI restriction sites (New England Biolabs). Bacterial expression of the uniformly  $^{13}\text{C}$ - and  $^{15}\text{N}$ -labeled GB1-linker constructs in *Escherichia coli* BL21(DE3) was performed in M9 minimal media in the presence of carbenicillin at 37°C. Protein expression was induced by the addition of 1 mM isopropyl  $\beta$ -D-1-thiogalacto-pyranoside (IPTG) overnight at 25°C. The cell pellet was lysed by sonication in buffer A (50 mM Tris-HCl, 10 mM DTT, pH 8) at 4°C. To precipitate nucleic acids and unwanted proteins, the lysate was acidified by 0.1% trifluoroacetic acid (TFA). Following centrifugation, the supernatant was purified using a C4 HPLC packed column (200×150 mm, Waters) with a water/acetonitrile gradient in the presence of 0.1% (v/v) TFA at 40 °C.

## References

- (21) Vogel, A.; Reuther, G.; Weise, K.; Triola, G.; Nikolaus, J.; Tan, K. T.; Nowak, C.; Herrmann, A.; Waldmann, H.; Winter, R.; Huster, D. The Lipid Modifications of Ras That Sense Membrane Environments and Induce Local Enrichment. *Angew Chem Int Ed Engl* **2009**, *48*, 8784-8787.
- (22) Lyukmanova, E. N.; Shenkarev, Z. O.; Shulepko, M. A.; Mineev, K. S.; D'Hoedt, D.; Kasheverov, I. E.; Filkin, S. Y.; Krivolapova, A. P.; Janickova, H.; Dolezal, V.; Dolgikh, D. A.; Arseniev, A. S.; Bertrand, D.; Tsetlin, V. I.; Kirpichnikov, M. P. NMR Structure and Action on Nicotinic Acetylcholine Receptors of Water-Soluble Domain of Human LYNX1. *J Biol Chem* **2011**, *286*, 10618-10627.

- (62) Yang, Y.; Ramelot, T. A.; McCarrick, R. M.; Ni, S.; Feldmann, E. A.; Cort, J. R.; Wang, H.; Ciccocanti, C.; Jiang, M.; Janjua, H.; Acton, T. B.; Xiao, R.; Everett, J. K.; Montelione, G. T.; Kennedy, M. A. Combining NMR and EPR Methods for Homodimer Protein Structure Determination. *J Am Chem Soc* **2010**, *132*, 11910-11913.
- (S1) Baeschlin, D. K.; Chaperon, A. R.; Charbonneau, V.; Green, L. G.; Ley, S. V.; Lucking, U.; Walther, E. Rapid Assembly of Oligosaccharides: Total Synthesis of a Glycosylphosphatidylinositol Anchor of Trypanosoma Brucei *Angew. Chem. Int. Ed.* **1998**, *37*, 3423-3428.
- (S2) Q.-M. Gu.; Prestwich, G. D. Synthesis of Phosphotriester Analogues of the Phosphoinositides PtdIns(4,5)P<sub>2</sub> and PtdIns(3,4,5)P<sub>3</sub>. *J. Org. Chem.*, **1996**, *61*, 8642-8647.
- (S3) Paulick, M. G.; Wise, A. R.; Forstner, M. B.; Groves, J. T.; Bertozzi, C. R. Synthetic Analogues of Glycosylphosphatidylinositol-Anchored Proteins and Their Behavior in Supported Lipid Bilayers. *J. Am. Chem. Soc.* **2007**, *129*, 11543-11550.

## Scheme

**Scheme 1.** Synthetic scheme of the GPI anchor mimic.

## Figures

**Figure S1.** Gel filtration profiles of the reaction mixture and each eluted fraction from gravity-flow column filtration of the reaction mixture between GB1 and the bicelle-containing anchor. Fraction numbers are shown at the top left in each profile. Beginning at fraction 7, the uncoupled GB1 signal gradually appeared.

**Figure S2.** Schematics of NMR pulse sequences used for measurements of backbone amide  $^{15}\text{N}$  longitudinal relaxation rate constant  $R_1^{\text{N}}$ . Narrow and wide black rectangles correspond to  $90^\circ$  and  $180^\circ$  pulses, respectively. Phases of RF pulses in the sequences are as follows:  $\phi_1 = \text{x, x, -x, -x}$ ;  $\phi_2 = \text{y, -y}$ ;  $\phi_3 = \text{x, x, -x, -x}$ ;  $\phi_4 = \text{x, x, x, x, y, y, y, y, -x, -x, -x, -x, -y, -y, -y, -y}$ ;  $\phi_5 = \text{x, x, -x, -x, y, y, -y, -y}$ ;  $\phi_6 = \text{-y, y, -y, y, x, -x, x, -x}$ ;  $\phi_7 = \text{y, -y, y, -y, -x, x, -x, x}$ ; receiver =  $\text{x, -x, x, -x, y, -y, y, -y, -x, x, -x, x, -y, y, -y, y}$ .

**Figure S3.** Comparison of the backbone amide  $^{15}\text{N}$  longitudinal relaxation rate constant  $R_1^{\text{N}}$  of GB1. The  $R_1^{\text{N}}$  values of the anchored GB1 in the bicelles prepared in this study are shown in red, and those reported by the solution NMR experiment at  $30^\circ\text{C}$ , pH 7.2 performed by Idiyatullin *et al.* in blue.<sup>53</sup> The  $R_1^{\text{N}}$  values of the residues whose quantitative measurement could not be made were set to zero.

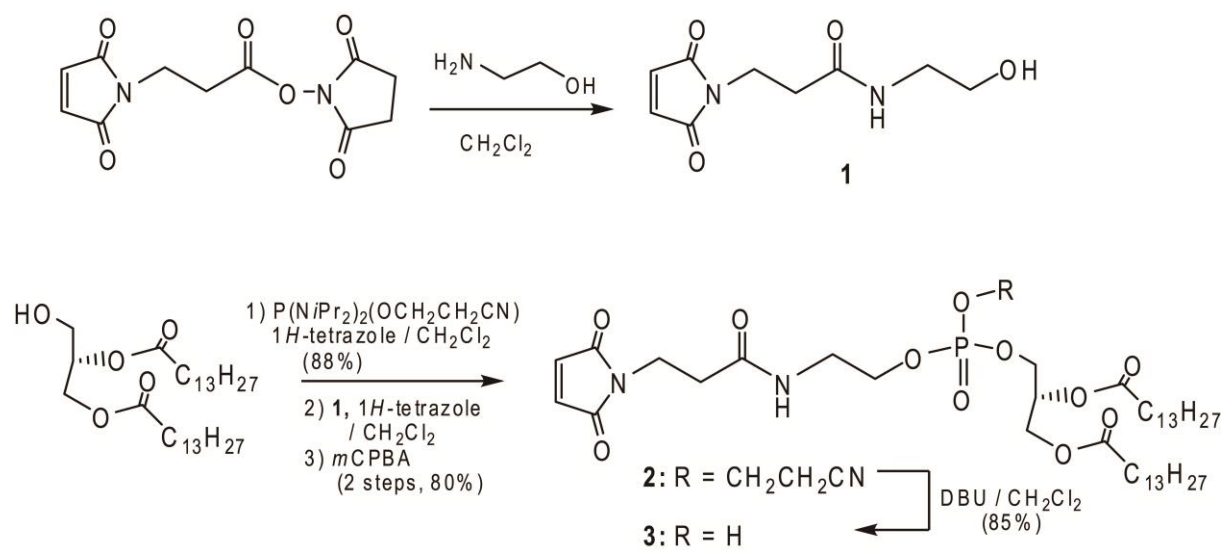

**Scheme S1**

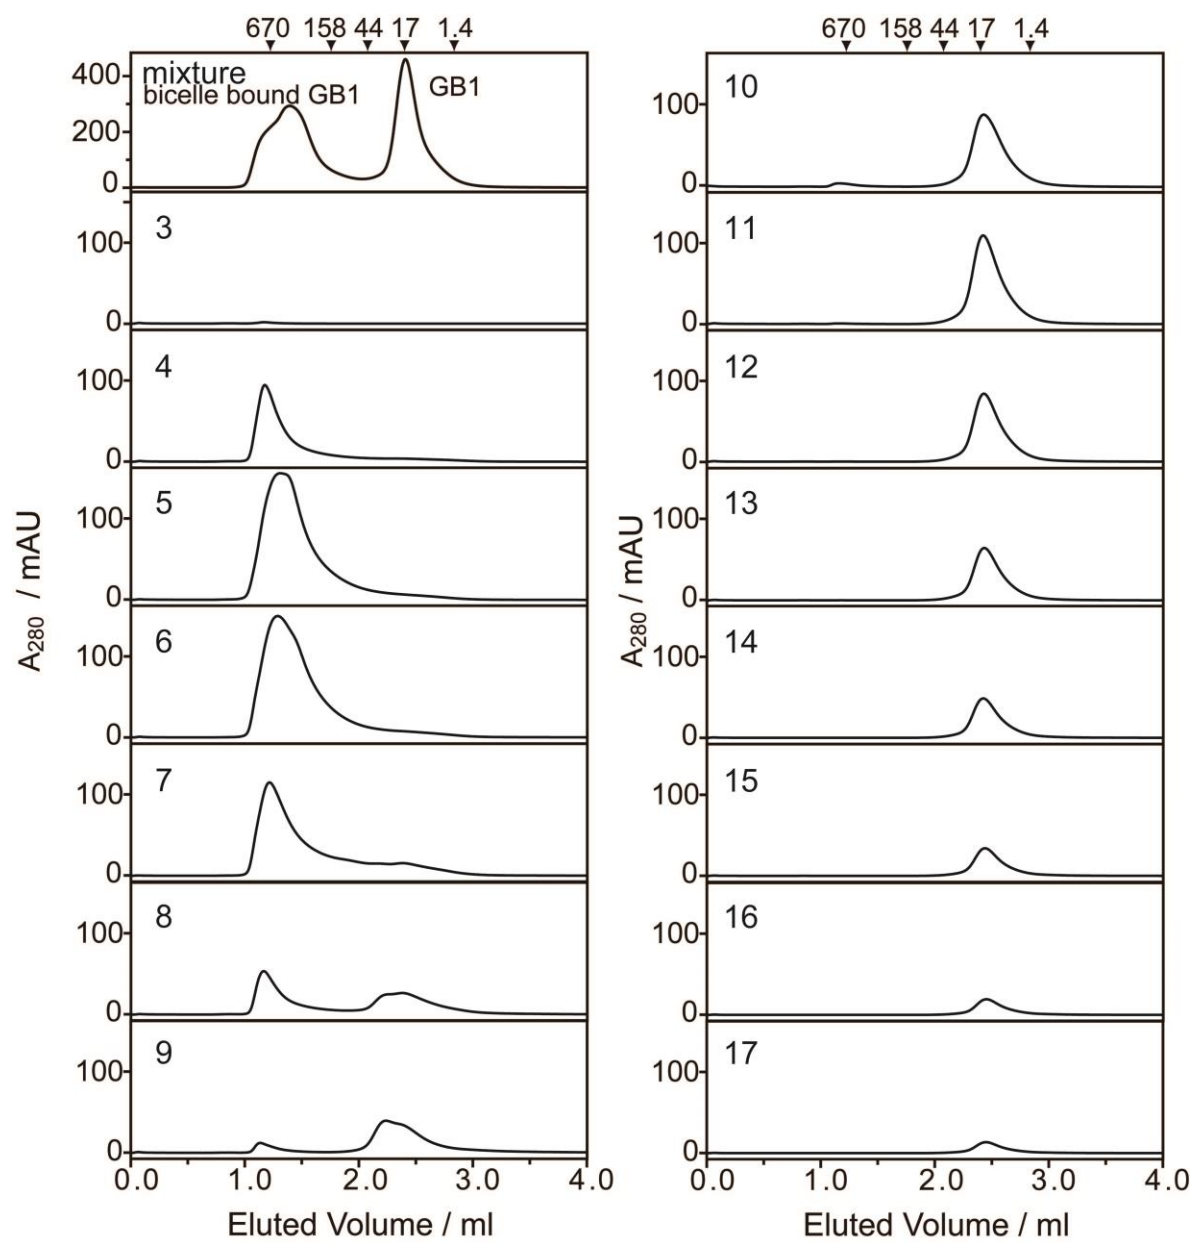

**Figure S1**

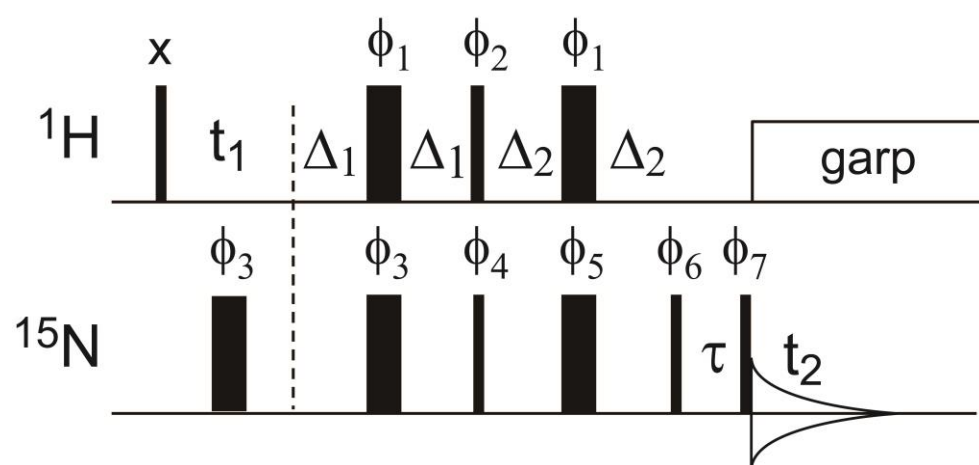

**Figure S2**

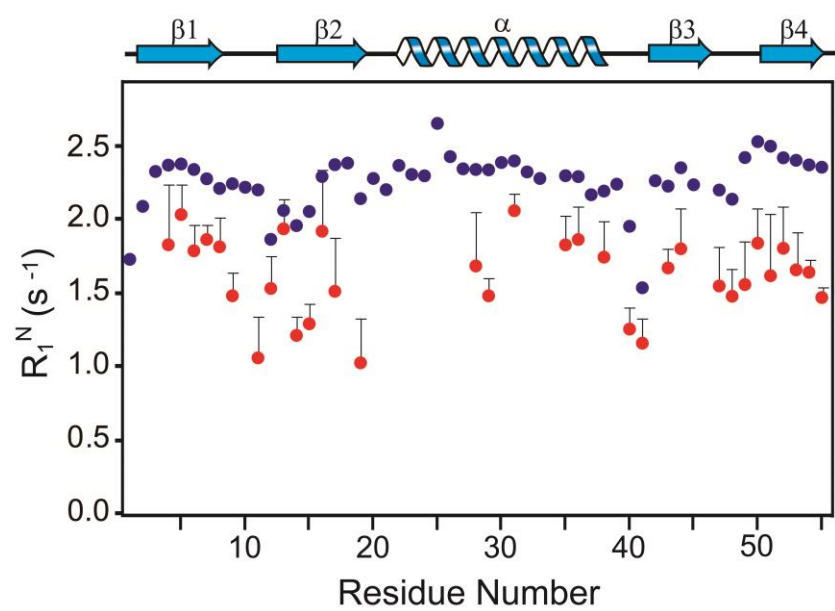

**Figure S3.**
